1 **Differential effects of socio-demographic factors on maternal haemoglobin**  
2 **concentration in three sub-Saharan African Countries**

3

4 Dickson A. Amugsi<sup>1\*</sup>

5 [damugsi2002@yahoo.com](mailto:damugsi2002@yahoo.com); [damugsi@aphrc.org](mailto:damugsi@aphrc.org)

6 Zacharie T. Dimbuene<sup>2, 3</sup>

7 [zacharie.tsala.dimbuene@gmail.com](mailto:zacharie.tsala.dimbuene@gmail.com)

8 Catherine Kyobutungi<sup>1</sup>

9 [ckyobutungi@aphrc.org](mailto:ckyobutungi@aphrc.org)

10

11 1. Maternal and Child Wellbeing Unit, African Population and Health Research Center,  
12 APHRC Campus, P.O Box 10787-00100, Nairobi, Kenya

13 2. Department of Population Sciences and Development, University of Kinshasa,  
14 Democratic Republic of the Congo

15 3. Social Analysis and Modeling Division, Statistics Canada, Ottawa, Canada K1A 0T6

16

17 \* Corresponding author: Dr Dickson A. Amugsi

18 Email: [damugsi2002@yahoo.com](mailto:damugsi2002@yahoo.com); [damugsi@aphrc.org](mailto:damugsi@aphrc.org)

19

20 Word count: 3493

21

22

23

24

25

26

27

28

29

30 **Abstract**

31 **Objective:** To investigate the effects of socio-demographic factors on maternal  
32 haemoglobin (Hb) at different points of the conditional distribution of Hb concentration.

33 **Methods:** We analysed the Demographic and Health Surveys data from Ghana,  
34 Democratic Republic of the Congo (DRC) and Mozambique, using Hb concentration of  
35 mothers aged 15-49 years as an outcome of interest. We utilise quantile regression to  
36 estimate the effects of the socio-demographic factors across specific points of the  
37 maternal Hb concentration.

38 **Results:** The results showed crucial differences in the effects of socio-demographic  
39 factors along the conditional distribution of Hb concentration. In Ghana, maternal  
40 education had a positive effect on Hb concentration in the 5<sup>th</sup> and 10<sup>th</sup> quantiles. The  
41 positive effect of education on maternal Hb concentration occurred across all quantiles  
42 in Mozambique, with the largest effect at the lowest quantile (5<sup>th</sup>) and the smallest effect  
43 at the highest quantile (90<sup>th</sup>). In contrast, maternal education had a negative effect on  
44 the Hb concentration of mothers in the 50<sup>th</sup>, 75<sup>th</sup> and 90<sup>th</sup> quantiles in DRC. Maternal  
45 body mass index (BMI) had a positive effect on Hb concentration of mothers in the 5<sup>th</sup>,  
46 10<sup>th</sup>, 50<sup>th</sup> and 90<sup>th</sup>, and 5<sup>th</sup> to 50<sup>th</sup> quantiles in Ghana and Mozambique, respectively.  
47 Breastfeeding had a significant positive effect on Hb concentration across all countries,  
48 with the largest effect on Hb concentration of mothers in the lower quantiles. All the  
49 household wealth indices had positive effects on maternal Hb concentration across  
50 quantiles in Mozambique, with the largest effect among mothers in the upper quantiles.  
51 However, in Ghana, living in a poor wealth index was inversely related with Hb  
52 concentration of mothers in the 5<sup>th</sup> and 10<sup>th</sup> quantiles.

53 **Conclusions:** Our results showed that the effects of socio-demographic factors on  
54 maternal Hb concentration vary along its distribution. Interventions to address maternal  
55 anaemia should take these variations into account to identify the most vulnerable  
56 groups.

57

58 **Keywords:** Haemoglobin concentration, socio-demographics, Africa, quantile  
59 regression

60

61

62 **What this study adds**

- 63 • Quantile regression can be used effectively to analyse anaemia data
- 64 • Socio-demographic factors have differential effects on Hb at different points of its  
65 distribution
- 66 • Interpreting results based on the mean effect (as in OLS) only provides a partial  
67 picture
- 68 • Breastfeeding has positive effect on maternal Hb concentration
- 69 • The use of multicountry data revealed differences and commonalities between  
70 countries

71

72

73

74

75

76

77

78

79

80

81

82

83

84

85

86

87

88

## 89 **Introduction**

90 Maternal anaemia or low haemoglobin (Hb) concentration, a condition in which the Hb is  
91 lower than normal is a worldwide public health problem (1). It is caused by deficiencies  
92 in iron, folate, copper, and other vital vitamins(2, 3). Also, infectious disease morbidity,  
93 parasitic infections and genetic disorders among others could cause low Hb  
94 concentration (3, 4). While the causes of low Hb concentration are multifaceted, the  
95 evidence show that an estimated 50% of low Hb concentration cases reported  
96 worldwide are due to iron deficiency (5-7). The available data suggest that anaemia  
97 affects about 500 million women of reproductive age, globally (8, 9). The World Health  
98 Organisation (WHO) estimates indicate that the global anaemia prevalence >30% (2, 6).  
99 Consequently, the WHO included a target of reducing anaemia among women of  
100 reproductive age by 50% by 2025 in its Global Nutrition Targets (GNT) (5). Similarly,  
101 anaemia was recently added as an indicator to track the progress of sub-goal 2.2 of the  
102 Sustainable Development Goals (SDGs) to end all forms of malnutrition by  
103 2030(10). The problem of maternal low Hb concentration is particularly severe in sub-  
104 Saharan Africa (SSA) where poverty is highly prevalent and nutritious food is not easily  
105 accessible, coupled with high incidence of infectious diseases (11-13).

106

107 The consequences of low Hb concentration on the health of women include but are not  
108 limited to increased risks of low birth weight, preterm birth, perinatal mortality, and  
109 neonatal mortality (14). Low Hb concentration also places mothers at an elevated risk of  
110 death during childbirth and postpartum (15). Additionally, the literature suggests that  
111 deficient Hb concentration can result in cardiac decompensation (i.e. the failure of the  
112 heart to maintain adequate blood circulation). It also elevates the risk of haemorrhage  
113 and decreases the ability to tolerate blood loss, which can lead to circulatory shock and  
114 death (16, 17). The consequences of low Hb concentration mentioned above calls for  
115 an investigation that would examine the effects of putative factors across the conditional

116 distribution of the Hb concentration. Such an inquiry will provide entry points for  
117 interventions to address maternal anaemia in developing countries. This study intends  
118 to achieve this goal by using an analytical strategy that focuses on the effects of socio-  
119 demographic factors at different stages of the conditional distribution of maternal Hb  
120 concentration.

121

122 The existing literature has identified several factors that have both negative and positive  
123 effects on maternal Hb concentration. Some of these factors include, maternal age,  
124 education, parity, marital status, household size, socioeconomic status, place of  
125 residence, body mass index (BMI) and breastfeeding (18-25). A study in Dhaka showed  
126 a strong relationship between maternal age, education level, income level, and maternal  
127 Hb concentration (18). Moreover, higher BMI, primiparity, and living in better-off  
128 households were associated with higher levels of Hb (21, 22). On the contrary, low  
129 family income and large family size are associated negatively with maternal Hb  
130 concentration (24). Further, low maternal BMI, parity, living in poorest wealth quintile  
131 and breastfeeding were inversely related to maternal Hb concentration (25). Other  
132 studies have shown that being separated or widowed, using an intrauterine device and  
133 place of residence increased the odds of low Hb concentration among women (22, 23).

134

135 Indeed, from the studies reviewed above, it appears the literature on maternal anaemia  
136 is abundant. Nonetheless, there are shortfalls with the analytical strategies employed in  
137 these studies. For example, almost all these studies used either Ordinary Least  
138 Squares (OLS) or logistic regression to estimate the effects of socio-demographics on  
139 Hb concentration. This may mask the differential effects that may occur throughout the  
140 entire distribution of the Hb concentration--socio-demographic factors may influence  
141 maternal Hb differently across the distribution of the Hb concentration. These  
142 differences in the effects of socio-demographic factors on Hb concentration suggest the  
143 need to undertake an analysis that has the potential to present a comprehensive and

144 complete picture of the effects of these factors on maternal Hb concentration. The  
145 quantile regression analytical strategy utilised in this paper can determine the effects of  
146 the socio-demographic factors at different points of the conditional distribution of  
147 maternal Hb concentration. Therefore, the objective this study was to examine the  
148 effects of sociodemographic factors on maternal Hb concentration using quantile  
149 regression. This type of analysis is currently missing in the anaemia research arena.

150

## 151 **Methods**

### 152 *Data sources and study design*

153 This study involved a secondary analysis of the demographic and health survey (DHS)  
154 data (26) from Ghana, Mozambique, and Democratic Republic of Congo (DRC). These  
155 are nationally representative data collected every five years in low and middle income  
156 countries (LMICs). We based the selection of the three countries on our previous  
157 analysis (27), as well as availability of anaemia data. In designing the surveys, the DHS  
158 ensured that the surveys are identical across all participating countries to facilitate  
159 comparison between and among nations. The DHS utilised a two-stage sample design  
160 in the selection of participating households in their surveys. The detail description of the  
161 DHS design processes is published elsewhere (28-32).

### 162 *Study participants*

163 The study participants were women aged 15-49 years and who had complete anaemia  
164 data. Information on study participants was obtained through a face-to-face interviews.  
165 The DHS collected blood samples for anaemia testing from mothers who voluntarily  
166 consented to be tested (30). Blood samples were drawn from a drop of blood taken from  
167 a finger prick and collected in a microcuvette. Hb concentration analysis was  
168 undertaken on-site using a battery-operated portable HemoCue analyser. Non-pregnant  
169 women with a Hb concentration less than 7.0 g/dl, and pregnant women with a Hb  
170 concentration lower than 9.0 g/dl were referred to a nearby health facility for immediate  
171 treatment (30). The total samples per respective countries were as follows: Ghana (n=  
172 2975), DRC (n= 9438) and Mozambique (n= 10961).

173

174

175

176 **Ethical statement**

177 The DHS study was undertaken based on high ethical standards (33). Data collectors  
178 were trained to recognise and respect the rights of study participants. They also  
179 informed participants of their rights to decide whether to participate in the study or not.  
180 The risks and benefits of the study as well as steps taken to mitigate the potential risks  
181 were adequately explained to study participants. The protocols of the study in each  
182 country, including biomarker collection, were approved by the recognised ethics review  
183 committees of each country, and the Institutional Review Board of ICF International,  
184 USA. Written informed consent was obtained from each study participant before they  
185 were allowed to participate in the study. The biomarker results were made available to  
186 study participants (30). The DHS Program, USA, granted permission to the authors for  
187 the use of the data.

188

189 **Measures**

190 *Outcome variable*

191 We used maternal Hb concentration (g/dl) as the outcome variable for this analysis. As  
192 described in the preceding sections, DHS collected blood samples from eligible women  
193 to test for anaemia using various strategies. The Hb concentration is captured first in the  
194 DHS data as a continuous variable and then categorised into three levels of anaemia:  
195 mild, moderate and severe. In this analysis, we used the Hb concentration as a  
196 continuous variable.

197 *Predictor variables*

198 We grouped the predictor variables into three main categories: *maternal* (education,  
199 age, BMI, employment status, parity, breastfeeding status, marital status and ANC

200 attendance); *household* (wealth index, sex of household head, household size, number  
201 of children U5, decision making on large household purchases and husband/partner  
202 education) and *community* (place of residence). The DHS created the household wealth  
203 index using assets ownership and housing characteristics: type of roofing, and flooring  
204 material, source of drinking water, sanitation facilities, ownership of television, bicycle,  
205 motorcycle, automobile among others. The detail of the computation processes is  
206 published elsewhere (30). The maternal BMI (Kg/m<sup>2</sup>) was obtained by dividing weight in  
207 kilogrammes by height in meters squared.

208

## 209 **Data analysis**

### 210 *Outline of quantile regression model*

211 Koenker and Bassett (34) introduced the quantile regression (QR) as a *location*  
212 *model* to extend Ordinary Least Squares (OLS). It is the case because OLS  
213 summarises the distribution at the grand mean. However, the QR assesses more  
214 general class of linear models in which, the conditional quantiles have a linear form to  
215 fully account for the overall distribution of the response variable. To formalise the QR,  
216 we consider a real-valued random variable  $Y$  characterized by the following distribution  
217 function (34, 35);

$$218 F(y) = \Pr(Y \leq y) \tag{1}$$

219 Then for any  $\alpha \in (0, 1)$ , the  $\alpha$ -th quantile of  $Y$  is defined as:

$$220 Q(\alpha) = \inf\{y: F(y) \geq \alpha\} \tag{2}$$

221 The common quantiles  $\alpha$  from Equation (1) are  $\alpha = .25$ ,  $\alpha = .50$ , and  $\alpha = .75$  for the  
222 first, quartile, the median and the third quartile. Therefore, unlike the OLS, which  
223 minimises the squared differences around the mean, QR minimises the  
224 weighted *absolute* difference between the observed value of  $y$  and the  $\alpha$ -th quintile of  $Y$ .  
225 The preceding discussion demonstrates that OLS is nested within QR (34, 35).

226



## 227 **Analytical approach utilised**

228 We used quantile regression (QR) (34) to examine the effects of the putative socio-  
229 demographic factors on maternal Hb concentration. Using the QR, we were able to  
230 investigate the effects of the predictor variables at different points of the conditional  
231 distribution of the outcome variable (Hb concentration). This type of analysis cannot be  
232 done with OLS, because standard OLS regression techniques summarise the average  
233 relationship between a set of regressors and the outcome variable based on the  
234 conditional mean function  $E(y|x)$ . Thus, it provides only a partial view of the  
235 relationship, as we might be interested in describing the relationship at different points  
236 in the conditional distribution of  $y$ . The QR, unlike OLS, provides a complete view of the  
237 effects of the socio-demographic factors on maternal Hb concentration. Thus, making it  
238 possible to identify the vulnerable groups that are in dire need of interventions. Further,  
239 QR is more robust in handling non-normal errors and outliers compared with OLS (34).  
240 Finally, QR provides a richer characterisation of the data, thereby illuminating the  
241 effects of a covariate on the entire distribution of the outcome variable. In this analysis,  
242 we also estimated OLS estimates for comparison purpose, and QR at the 5<sup>th</sup>, 10<sup>th</sup>, 25<sup>th</sup>,  
243 50<sup>th</sup>, 75<sup>th</sup> and 90<sup>th</sup> quantiles (27, 36).

244

245 Furthermore, since we did not have a specific predictor variable of interest, all the socio-  
246 demographic variables were included simultaneously in the models. They include,  
247 maternal education, age, BMI, employment status, parity, breastfeeding status, marital  
248 status, ANC attendance, household wealth index, sex of household head, household  
249 size, number of children under five years, decision making on large household  
250 purchases, husband/partner education and place of residence. The variables outlined  
251 above were selected based on the literature, followed by bivariate analysis. Significant  
252 variables in the bivariate analysis were included in the QR models.

253

## 254 **Results**

255 *Descriptive analysis of the characteristics of samples*

256 The descriptive results (Table 1) showed that maternal mean Hb concentration was  
 257 relatively the same across all the three countries: Ghana (11.95±1.49), DRC  
 258 (12.05±1.65) and Mozambique (11.64±1.73). Mothers in Ghana (5.27±4.92) spent a  
 259 little more years in education than those in DRC (4.88±3.77) and Mozambique  
 260 (3.46±3.45). The age of the study participants ranged from 28 years in Mozambique to  
 261 31 years in Ghana. Moreover, mothers in Ghana tended to have higher mean BMI  
 262 (24.34±4.96) relative to those in DRC (21.79±3.66) and Mozambique (22.53±3.70). In  
 263 DRC, 68% of mothers indicated they were breastfeeding at the time of the study, while  
 264 the number of breastfeeding mothers in Ghana and Mozambique stood at 58%,  
 265 respectively.

266

267 **Table 1: Characteristics of the socio-demographic variables of the three countries**

| Variables                                         | Ghana (n=2975) |      | DRC (n=9438) |      | Mozambique (n=10961) |      |
|---------------------------------------------------|----------------|------|--------------|------|----------------------|------|
|                                                   | Mean/%         | SD   | Mean/%       | SD   | Mean/%               | SD   |
| <b>Maternal-level variables</b>                   |                |      |              |      |                      |      |
| Hb concentration (g/dl)                           | 11.95          | 1.49 | 12.05        | 1.65 | 11.64                | 1.73 |
| Women education (in years)                        | 5.27           | 4.92 | 4.88         | 3.77 | 3.46                 | 3.45 |
| Age (in years)                                    | 30.65          | 6.96 | 29.13        | 6.94 | 28.38                | 7.18 |
| Women's Body Mass Index (BMI)(Kg/m <sup>2</sup> ) | 24.34          | 4.96 | 21.79        | 3.66 | 22.53                | 3.70 |
| Working (yes)                                     | 79.3           |      | 76.0         |      | 37.5                 |      |
| Parity                                            | 3.62           | 2.17 | 4.42         | 2.56 | 3.8                  | 2.28 |
| Breastfeeding (yes)                               | 57.9           |      | 67.8         |      | 57.6                 |      |
| <b>Marital status</b>                             |                |      |              |      |                      |      |
| Never married                                     | 6.4            |      | 4.2          |      | 5.6                  |      |
| Married or Cohabiting                             | 87.4           |      | 87.1         |      | 82.8                 |      |
| Divorced/Widowed/Separated                        | 6.2            |      | 8.7          |      | 11.6                 |      |
| <b>Household-level variables</b>                  |                |      |              |      |                      |      |
| <b>Wealth index</b>                               |                |      |              |      |                      |      |
| Poorest                                           | 33.0           |      | 27.4         |      | 18.2                 |      |
| Poor                                              | 21.1           |      | 22.9         |      | 18.9                 |      |
| Middle                                            | 19.0           |      | 20.7         |      | 19.7                 |      |
| Rich                                              | 15.1           |      | 17.1         |      | 22.1                 |      |
| Richest                                           | 12.3           |      | 12.1         |      | 21.1                 |      |
| Head of household (Female)                        | 23.7           |      | 22.2         |      | 32.9                 |      |
| Household size                                    | 5.80           | 2.82 | 6.74         | 2.86 | 6.16                 | 2.79 |
| Number of children under five years               | 1.73           | 0.93 | 2.16         | 1.04 | 1.86                 | 0.98 |

*Decision on household large purchases*

|                                  |      |      |      |      |      |      |
|----------------------------------|------|------|------|------|------|------|
| Respondent alone                 | 16.0 |      | 12.5 |      | 11.1 |      |
| Respondent and Husband/Partner   | 46.5 |      | 50.3 |      | 57.1 |      |
| Husband/Partner alone            | 24.1 |      | 36.7 |      | 30.7 |      |
| Someone else/Other               | 13.4 |      | 0.59 |      | 1.1  |      |
| Husband education (in years)     | 7.04 | 5.44 | 8.53 | 4.11 | 4.28 | 3.95 |
| <b>Community-level variables</b> |      |      |      |      |      |      |
| Place of Residence (% urban)     | 39.8 |      | 28.7 |      | 32.1 |      |

SD: standard deviation; Hb: Haemoglobin;

268 **Notes:** SDs are reported only for continuous variables

269

270

271 *Quantile multivariable regression analysis of the effects of socio-demographic factors on*  
 272 *maternal Hb concentration*

273 In Tables 2-4, we present the QR results of the effects of socio-demographic factors on  
 274 maternal Hb concentration in Ghana, DRC and Mozambique. We also reported the OLS  
 275 estimates for the purposes of comparison with the QR results. The results from the  
 276 OLS analysis showed that maternal education had strong positive effects on Hb  
 277 concentration in Ghana and Mozambique. Thus, in both countries, one year increase in  
 278 education was associated with a unit increase maternal Hb concentration. A similar  
 279 effects of BMI on Hb concentration were observed in all the three countries, so was  
 280 breastfeeding practice.

281

282 However, in the QR analysis (Tables 2-4), the results revealed vital differences in  
 283 effects at different points in the conditional distribution of maternal Hb concentration. For  
 284 example, in Ghana, the effect of maternal years of education occurred at the first two  
 285 lowest quantiles (5<sup>th</sup> and 10<sup>th</sup>), with the largest effect at the 5<sup>th</sup> quantile. Similarly, in  
 286 Mozambique, one-year increase in maternal education was associated with a unit  
 287 increase in Hb concentration across all quantiles, with the largest effect on mothers in  
 288 the lowest quantile (5<sup>th</sup>) and the smallest effect at the highest quantile (90<sup>th</sup>).  
 289 Interestingly, in DRC, maternal years of education had an inverse relationship with Hb  
 290 concentration of mothers in the three upper quantiles. Thus, one-year increase in

291 maternal years of education was associated with 0.015, 0.020 and 0.023 units  
292 decrease in maternal Hb concentration at the 5<sup>th</sup>, 75<sup>th</sup> and 90<sup>th</sup> quantiles, respectively.  
293 In Ghana, maternal BMI had a significant positive effect on Hb concentration of mothers  
294 in the 5<sup>th</sup>, 10<sup>th</sup>, 50<sup>th</sup> and 90<sup>th</sup> quantiles. The effect on the remaining two quantiles did not  
295 reach statistical significance. The positive effects of BMI on maternal Hb concentration  
296 was at the three lowest quantiles (5<sup>th</sup>, 10<sup>th</sup> and 25<sup>th</sup>) in DRC, while in Mozambique, a  
297 unit increase in maternal BMI was associated with 0.031, 0.033, 0.029 and 0.018 units  
298 increase in maternal Hb concentration at the 5<sup>th</sup>, 10<sup>th</sup>, 25<sup>th</sup> and 50<sup>th</sup> quantiles,  
299 respectively. In each of the countries, the largest effect of maternal BMI on Hb  
300 concentration occurred at the lower end of the Hb distribution (i.e. lower quantiles).

301  
302 In Ghana, breastfeeding was positively and significantly associated with Hb  
303 concentration of mothers in the 5<sup>th</sup>, 10<sup>th</sup>, 25<sup>th</sup>, and 50<sup>th</sup> quantiles, with the least effect  
304 occurring at the 50<sup>th</sup> quantile. However, in DRC and Mozambique, breastfeeding had a  
305 decreasing effect across all quantiles in the respective countries. The largest effect in  
306 each country was at the lower end of the conditional distribution of the Hb  
307 concentration, while the smallest effect was at the higher end of the distribution. In  
308 Ghana, women participation in decision making regarding large household purchases  
309 was associated with better Hb concentration among mothers in the 25<sup>th</sup> and 50<sup>th</sup>  
310 quantiles, while the partner taking the decision alone was associated positively with the  
311 Hb concentration at 5<sup>th</sup>, 25<sup>th</sup> and 50<sup>th</sup> quantiles. On the contrary, there was an inverse  
312 effect of the partner alone, deciding on large household purchases on Hb concentration  
313 of mothers in the 25<sup>th</sup> and 50<sup>th</sup> quantiles in DRC. The effects of female household  
314 headship in DRC was mixed. It associated positively with Hb concentration of mothers  
315 in the first three quantiles (5<sup>th</sup>, 10<sup>th</sup> and 25<sup>th</sup>), and negatively with the two upper  
316 quantiles (75<sup>th</sup> and 90<sup>th</sup>). In Mozambique, the household wealth index had a significant  
317 and increasing effect on maternal Hb concentration across almost all the quantiles. The  
318 largest effect occurred at the highest end of the Hb distribution (90<sup>th</sup> quantile). In Ghana,  
319 being in a lower wealth index was associated with low Hb concentration among mothers  
320 in the 5<sup>th</sup> and 10<sup>th</sup> quantiles.



**Table 2: Effects of socio-demographic factors on maternal Hb concentration in Ghana**

| Variables                                          | OLS                 | Q5                  | Q10                 | Q25                 | Q 50                | Q75               | Q90               |
|----------------------------------------------------|---------------------|---------------------|---------------------|---------------------|---------------------|-------------------|-------------------|
| <b>Maternal level variables</b>                    |                     |                     |                     |                     |                     |                   |                   |
| Women education (in years)                         | 0.015*<br>(0.008)   | 0.063***<br>(0.016) | 0.044**<br>(0.016)  | 0.024<br>(0.013)    | 0.004<br>(0.010)    | -0.004<br>(0.009) | -0.007<br>(0.015) |
| Age (in years)                                     | 0.009<br>(0.006)    | 0.013<br>(0.011)    | 0.024<br>(0.013)    | 0.012<br>(0.011)    | 0.006<br>(0.008)    | -0.005<br>(0.008) | -0.001<br>(0.009) |
| Women's Body Mass Index (BMI) (Kg/m <sup>2</sup> ) | 0.020**<br>(0.006)  | 0.037**<br>(0.012)  | 0.022*<br>(0.010)   | 0.009<br>(0.009)    | 0.019*<br>(0.008)   | 0.012<br>(0.008)  | 0.024*<br>(0.010) |
| Mother working-No (reference)                      |                     |                     |                     |                     |                     |                   |                   |
| Mother working-Yes                                 | 0.121<br>(0.070)    | 0.008<br>(0.139)    | 0.003<br>(0.147)    | 0.129<br>(0.111)    | 0.142<br>(0.079)    | 0.095<br>(0.084)  | 0.159<br>(0.106)  |
| Parity                                             | -0.002<br>(0.021)   | -0.009<br>(0.060)   | -0.014<br>(0.064)   | 0.019<br>(0.035)    | 0.009<br>(0.031)    | 0.036<br>(0.030)  | 0.036<br>(0.029)  |
| Breastfeeding-No (reference)                       |                     |                     |                     |                     |                     |                   |                   |
| Breastfeeding-Yes                                  | 0.216***<br>(0.060) | 0.435***<br>(0.132) | 0.424***<br>(0.128) | 0.442***<br>(0.106) | 0.252**<br>(0.077)  | -0.099<br>(0.085) | -0.070<br>(0.101) |
| <b>Marital status</b>                              |                     |                     |                     |                     |                     |                   |                   |
| Never married (reference)                          |                     |                     |                     |                     |                     |                   |                   |
| Married or Cohabiting                              | -0.180<br>(0.328)   | -0.306<br>(0.650)   | -0.416<br>(0.766)   | -0.432<br>(0.523)   | -0.435<br>(0.504)   | 0.141<br>(0.491)  | -0.176<br>(0.573) |
| Divorced/Widowed/Separated                         | 0.154<br>(0.159)    | 0.507<br>(0.406)    | 0.189<br>(0.330)    | 0.413<br>(0.214)    | 0.084<br>(0.176)    | 0.138<br>(0.193)  | -0.384<br>(0.266) |
| Antenatal visits=0-3 (reference)                   |                     |                     |                     |                     |                     |                   |                   |
| Antenatal visits=4+                                | 0.212*<br>(0.093)   | 0.458<br>(0.247)    | 0.383<br>(0.214)    | 0.121<br>(0.167)    | 0.193<br>(0.121)    | 0.094<br>(0.131)  | 0.300*<br>(0.138) |
| <b>Household level variables</b>                   |                     |                     |                     |                     |                     |                   |                   |
| Wealth index-poorest (reference)                   |                     |                     |                     |                     |                     |                   |                   |
| Wealth index-Poor                                  | -0.199*<br>(0.082)  | -0.243<br>(0.177)   | -0.411*<br>(0.180)  | -0.169<br>(0.141)   | -0.188<br>(0.098)   | -0.136<br>(0.096) | -0.071<br>(0.145) |
| Wealth index-Middle                                | -0.128<br>(0.096)   | 0.012<br>(0.198)    | 0.109<br>(0.191)    | -0.076<br>(0.156)   | -0.303**<br>(0.117) | -0.079<br>(0.130) | 0.100<br>(0.176)  |
| Wealth index-Rich"                                 | 0.122<br>(0.119)    | 0.123<br>(0.266)    | 0.068<br>(0.257)    | 0.348<br>(0.195)    | 0.146<br>(0.128)    | 0.149<br>(0.135)  | 0.210<br>(0.228)  |
| Wealth index-Richest                               | 0.109<br>(0.141)    | 0.112<br>(0.302)    | 0.294<br>(0.300)    | 0.228<br>(0.245)    | 0.088<br>(0.149)    | 0.317<br>(0.176)  | 0.159<br>(0.229)  |
| Head of household-Male (reference)                 |                     |                     |                     |                     |                     |                   |                   |
| Head of household-Female                           | 0.067<br>(0.075)    | 0.016<br>(0.188)    | 0.149<br>(0.174)    | 0.102<br>(0.119)    | 0.005<br>(0.095)    | -0.004<br>(0.091) | 0.035<br>(0.109)  |
| Household size                                     | 0.011<br>(0.013)    | 0.001<br>(0.045)    | 0.031<br>(0.033)    | 0.019<br>(0.017)    | 0.004<br>(0.014)    | 0.000<br>(0.017)  | -0.003<br>(0.017) |
| Number of children under five                      | -0.060<br>(0.038)   | -0.001<br>(0.108)   | 0.053<br>(0.094)    | -0.095<br>(0.058)   | -0.128**<br>(0.045) | -0.087<br>(0.053) | 0.006<br>(0.058)  |

*Decision on large household purchases*

|                                      |                    |                    |                   |                    |                     |                    |                   |
|--------------------------------------|--------------------|--------------------|-------------------|--------------------|---------------------|--------------------|-------------------|
| Respondent alone (reference)         |                    |                    |                   |                    |                     |                    |                   |
| Respondent and Husband/Partner       | 0.232**<br>(0.080) | 0.227<br>(0.237)   | 0.268<br>(0.190)  | 0.247*<br>(0.124)  | 0.296**<br>(0.106)  | 0.120<br>(0.096)   | 0.160<br>(0.116)  |
| Husband/Partner alone                | 0.269**<br>(0.088) | 0.480*<br>(0.236)  | 0.294<br>(0.203)  | 0.379**<br>(0.121) | 0.357**<br>(0.118)  | 0.098<br>(0.101)   | -0.033<br>(0.144) |
| Someone else/Other                   | 0.008<br>(0.317)   | -0.281<br>(0.617)  | -0.153<br>(0.763) | -0.397<br>(0.501)  | -0.158<br>(0.500)   | 0.227<br>(0.470)   | 0.252<br>(0.550)  |
| Husband education (in years)         | -0.002<br>(0.007)  | -0.033*<br>(0.014) | -0.025<br>(0.016) | -0.001<br>(0.011)  | 0.013<br>(0.009)    | 0.001<br>(0.008)   | -0.006<br>(0.011) |
| Place of Residence-rural (reference) |                    |                    |                   |                    |                     |                    |                   |
| Place of Residence-Urban             | -0.097<br>(0.077)  | -0.128<br>(0.202)  | -0.037<br>(0.175) | -0.041<br>(0.111)  | -0.209**<br>(0.081) | -0.181*<br>(0.090) | -0.096<br>(0.140) |
| <b>Observations</b>                  | <b>2975</b>        | <b>2975</b>        | <b>2975</b>       | <b>2975</b>        | <b>2975</b>         | <b>2975</b>        | <b>2975</b>       |

Standard errors in parentheses; OLS: Ordinary least squares; Q: Quantile

\* p<0.05; \*\*p<0.01; \*\*\*p<0.001

**Table 3: Effects of socio-demographic factors on maternal Hb concentration in DRC**

| Variables                                         | OLS                 | Q5                  | Q10                 | Q25                 | Q 50                | Q75                 | Q90                 |
|---------------------------------------------------|---------------------|---------------------|---------------------|---------------------|---------------------|---------------------|---------------------|
| <b>Maternal level variables</b>                   |                     |                     |                     |                     |                     |                     |                     |
| Women education (in years)                        | -0.007<br>(0.006)   | 0.016<br>(0.018)    | -0.007<br>(0.013)   | 0.006<br>(0.008)    | -0.015**<br>(0.006) | -0.020**<br>(0.007) | -0.023*<br>(0.011)  |
| Age (in years)                                    | 0.004<br>(0.004)    | -0.010<br>(0.012)   | -0.007<br>(0.010)   | 0.006<br>(0.005)    | 0.012*<br>(0.005)   | 0.005<br>(0.005)    | 0.003<br>(0.006)    |
| Women's Body Mass Index (BMI)(Kg/m <sup>2</sup> ) | 0.015**<br>(0.005)  | 0.026***<br>(0.008) | 0.021**<br>(0.007)  | 0.014*<br>(0.006)   | 0.007<br>(0.005)    | 0.009<br>(0.007)    | 0.001<br>(0.010)    |
| Mother working-No (reference)                     |                     |                     |                     |                     |                     |                     |                     |
| Mother Working -Yes                               | -0.033<br>(0.041)   | 0.060<br>(0.107)    | 0.046<br>(0.082)    | -0.010<br>(0.052)   | -0.037<br>(0.044)   | 0.030<br>(0.051)    | -0.038<br>(0.070)   |
| Parity                                            | 0.016<br>(0.012)    | 0.052<br>(0.037)    | 0.041<br>(0.026)    | 0.017<br>(0.018)    | 0.003<br>(0.014)    | 0.014<br>(0.016)    | 0.023<br>(0.018)    |
| Mother breastfeeding-No (reference)               |                     |                     |                     |                     |                     |                     |                     |
| Mother breastfeeding-Yes                          | 0.470***<br>(0.038) | 0.745***<br>(0.117) | 0.662***<br>(0.079) | 0.686***<br>(0.057) | 0.488***<br>(0.045) | 0.355***<br>(0.057) | 0.219***<br>(0.061) |
| <b>Marital status</b>                             |                     |                     |                     |                     |                     |                     |                     |
| Never married (reference)                         |                     |                     |                     |                     |                     |                     |                     |
| Married or Cohabiting"                            | -0.128<br>(0.092)   | -0.219<br>(0.244)   | -0.372*<br>(0.169)  | -0.186<br>(0.127)   | -0.242**<br>(0.092) | -0.145<br>(0.103)   | 0.108<br>(0.132)    |
| Divorced/Widowed/Separated                        | 0.071<br>(0.103)    | -0.010<br>(0.307)   | -0.060<br>(0.191)   | -0.026<br>(0.141)   | 0.007<br>(0.106)    | 0.179<br>(0.126)    | 0.320*<br>(0.149)   |
| Antenatal visits=0-3 (reference)                  |                     |                     |                     |                     |                     |                     |                     |
| Antenatal visits=4+                               | 0.025<br>(0.039)    | 0.011<br>(0.098)    | 0.027<br>(0.078)    | 0.030<br>(0.053)    | 0.014<br>(0.043)    | 0.016<br>(0.045)    | 0.095<br>(0.063)    |
| <b>Household level variables</b>                  |                     |                     |                     |                     |                     |                     |                     |
| Wealth index-Poorest (reference)                  |                     |                     |                     |                     |                     |                     |                     |
| Wealth index-Poor                                 | -0.030<br>(0.048)   | 0.024<br>(0.158)    | 0.091<br>(0.116)    | -0.062<br>(0.074)   | -0.056<br>(0.048)   | -0.081<br>(0.061)   | -0.048<br>(0.085)   |
| Wealth index- Middle                              | 0.104*<br>(0.050)   | 0.219<br>(0.137)    | 0.282*<br>(0.118)   | 0.106<br>(0.070)    | 0.058<br>(0.054)    | -0.011<br>(0.068)   | 0.027<br>(0.087)    |
| Wealth index- Rich                                | 0.064<br>(0.058)    | 0.279<br>(0.148)    | 0.393**<br>(0.137)  | 0.112<br>(0.082)    | -0.004<br>(0.061)   | -0.106<br>(0.073)   | -0.020<br>(0.090)   |
| Wealth index- Richest                             | -0.062<br>(0.079)   | 0.192<br>(0.241)    | 0.206<br>(0.168)    | -0.072<br>(0.114)   | -0.207*<br>(0.095)  | -0.039<br>(0.096)   | -0.070<br>(0.125)   |
| Head of household-Male (reference)                |                     |                     |                     |                     |                     |                     |                     |
| Head of household-Female                          | 0.019<br>(0.045)    | 0.278*<br>(0.136)   | 0.249**<br>(0.083)  | 0.211***<br>(0.057) | -0.033<br>(0.046)   | -0.129*<br>(0.057)  | -0.179**<br>(0.068) |
| Household size                                    | 0.001<br>(0.008)    | 0.035<br>(0.020)    | 0.001<br>(0.016)    | -0.004<br>(0.012)   | -0.002<br>(0.011)   | 0.002<br>(0.010)    | -0.009<br>(0.011)   |
| Number of children under five                     | -0.015<br>(0.021)   | -0.107<br>(0.056)   | -0.051<br>(0.053)   | 0.021<br>(0.031)    | -0.037<br>(0.023)   | -0.042<br>(0.026)   | 0.020<br>(0.035)    |





**Table 4: Effects of socio-demographic factors on maternal Hb concentration in Mozambique**

| Variables                                         | OLS                 | Q5                  | Q10                 | Q25                 | Q 50                | Q75                 | Q90                 |
|---------------------------------------------------|---------------------|---------------------|---------------------|---------------------|---------------------|---------------------|---------------------|
| <b>Maternal level variables</b>                   |                     |                     |                     |                     |                     |                     |                     |
| Women education (in years)                        | 0.035***<br>(0.007) | 0.055**<br>(0.021)  | 0.043**<br>(0.015)  | 0.030**<br>(0.011)  | 0.037***<br>(0.008) | 0.046***<br>(0.009) | 0.027*<br>(0.011)   |
| Age (in years)                                    | 0.001<br>(0.004)    | 0.002<br>(0.009)    | 0.001<br>(0.007)    | 0.001<br>(0.006)    | 0.005<br>(0.004)    | 0.000<br>(0.005)    | 0.001<br>(0.005)    |
| Women's Body Mass Index (BMI)(Kg/m <sup>2</sup> ) | 0.019***<br>(0.005) | 0.031*<br>(0.015)   | 0.033**<br>(0.011)  | 0.029***<br>(0.007) | 0.018**<br>(0.006)  | 0.008<br>(0.007)    | 0.008<br>(0.008)    |
| Mother working-No (reference)                     |                     |                     |                     |                     |                     |                     |                     |
| Mother working-Yes                                | -0.049<br>(0.034)   | 0.004<br>(0.094)    | -0.038<br>(0.071)   | -0.092<br>(0.052)   | 0.001<br>(0.039)    | -0.013<br>(0.042)   | -0.080<br>(0.052)   |
| Parity                                            | 0.025*<br>(0.012)   | 0.069*<br>(0.027)   | 0.061**<br>(0.024)  | 0.024<br>(0.015)    | 0.003<br>(0.011)    | 0.023<br>(0.017)    | 0.004<br>(0.018)    |
| Mother breastfeeding-No (reference)               |                     |                     |                     |                     |                     |                     |                     |
| Mother breastfeeding-Yes                          | 0.424***<br>(0.036) | 0.732***<br>(0.100) | 0.663***<br>(0.077) | 0.520***<br>(0.055) | 0.459***<br>(0.041) | 0.310***<br>(0.051) | 0.219***<br>(0.054) |
| <b>Marital status</b>                             |                     |                     |                     |                     |                     |                     |                     |
| Never married (reference)                         |                     |                     |                     |                     |                     |                     |                     |
| Married or Cohabiting                             | -0.067<br>(0.087)   | -0.445*<br>(0.210)  | -0.275<br>(0.160)   | -0.159<br>(0.136)   | 0.139<br>(0.106)    | -0.055<br>(0.121)   | 0.075<br>(0.134)    |
| Divorced/Widowed/Separated                        | -0.139<br>(0.092)   | -0.495*<br>(0.220)  | -0.221<br>(0.205)   | -0.144<br>(0.149)   | -0.062<br>(0.113)   | -0.138<br>(0.121)   | -0.005<br>(0.141)   |
| Antenatal visits=0-3 (reference)                  |                     |                     |                     |                     |                     |                     |                     |
| Antenatal visits = 4+                             | 0.049<br>(0.036)    | 0.045<br>(0.086)    | 0.028<br>(0.067)    | 0.035<br>(0.048)    | 0.015<br>(0.038)    | 0.036<br>(0.041)    | 0.075<br>(0.051)    |
| <b>Household level variables</b>                  |                     |                     |                     |                     |                     |                     |                     |
| Wealth index-Poorest (reference)                  |                     |                     |                     |                     |                     |                     |                     |
| Wealth index-Poor                                 | 0.255***<br>(0.054) | -0.114<br>(0.157)   | 0.198<br>(0.110)    | 0.174*<br>(0.076)   | 0.285***<br>(0.063) | 0.326***<br>(0.063) | 0.429***<br>(0.074) |
| Wealth index- Middle                              | 0.367***<br>(0.054) | 0.246<br>(0.131)    | 0.397***<br>(0.109) | 0.249***<br>(0.073) | 0.335***<br>(0.055) | 0.399***<br>(0.067) | 0.552***<br>(0.075) |
| Wealth index-Rich                                 | 0.380***<br>(0.056) | 0.242<br>(0.146)    | 0.406***<br>(0.118) | 0.268***<br>(0.079) | 0.337***<br>(0.059) | 0.400***<br>(0.067) | 0.594***<br>(0.085) |
| Wealth index-Richest                              | 0.257***<br>(0.073) | -0.122<br>(0.191)   | 0.036<br>(0.150)    | 0.147<br>(0.109)    | 0.198**<br>(0.074)  | 0.374***<br>(0.098) | 0.474***<br>(0.111) |
| Head of household-Male (reference)                |                     |                     |                     |                     |                     |                     |                     |
| Head of household-Female                          | -0.010<br>(0.039)   | -0.061<br>(0.100)   | -0.150<br>(0.083)   | -0.040<br>(0.057)   | 0.075<br>(0.045)    | -0.050<br>(0.047)   | -0.074<br>(0.067)   |
| Household size                                    | 0.015<br>(0.008)    | 0.014<br>(0.016)    | 0.007<br>(0.016)    | 0.004<br>(0.012)    | 0.028***<br>(0.008) | 0.007<br>(0.011)    | 0.011<br>(0.017)    |
| Number of children under five                     | -0.025<br>(0.022)   | -0.077<br>(0.054)   | -0.070<br>(0.051)   | 0.001<br>(0.035)    | -0.053*<br>(0.024)  | 0.015<br>(0.034)    | 0.003<br>(0.034)    |

*Decision on large household purchases*

Respondent alone (reference)

|                                      |                   |                    |                    |                     |                   |                   |                  |
|--------------------------------------|-------------------|--------------------|--------------------|---------------------|-------------------|-------------------|------------------|
| Respondent and Husband/Partner       | 0.010<br>(0.056)  | -0.146<br>(0.143)  | -0.092<br>(0.106)  | -0.050<br>(0.084)   | 0.075<br>(0.064)  | 0.027<br>(0.062)  | 0.088<br>(0.093) |
| Husband/Partner alone                | -0.032<br>(0.059) | -0.021<br>(0.149)  | -0.061<br>(0.112)  | -0.031<br>(0.088)   | -0.050<br>(0.065) | -0.020<br>(0.069) | 0.043<br>(0.099) |
| Someone else/Other                   | 0.244<br>(0.168)  | 0.817<br>(0.605)   | 0.349<br>(0.230)   | 0.133<br>(0.267)    | 0.062<br>(0.227)  | 0.430*<br>(0.172) | 0.314<br>(0.260) |
| Husband education (in years)         | 0.011*<br>(0.006) | -0.002<br>(0.015)  | 0.019<br>(0.012)   | 0.015<br>(0.008)    | 0.013<br>(0.006)  | 0.002<br>(0.007)  | 0.011<br>(0.010) |
| Place of Residence-Rural (reference) |                   |                    |                    |                     |                   |                   |                  |
| Place of Residence-Urban             | -0.059<br>(0.046) | -0.278*<br>(0.129) | -0.203*<br>(0.088) | -0.184**<br>(0.067) | 0.019<br>(0.046)  | -0.021<br>(0.058) | 0.139<br>(0.072) |
| <b>Observations</b>                  | <b>10961</b>      | <b>10961</b>       | <b>10961</b>       | <b>10961</b>        | <b>10961</b>      | <b>10961</b>      | <b>10961</b>     |

Standard errors in parentheses; OLS: Ordinary least squares; Q: Quantile

\* p<0.05; \*\*p<0.01; \*\*\*p<0.001

336

337

338 Figures 1-3 are visual presentations of the effects of the various socio-demographic  
339 factors on maternal Hb concentration in the three countries included in the analysis.

340

341 **Figure 1: Pictorial presentation of the effects of socio-demographic factors on**  
342 **maternal Hb concentration in Ghana**

343

344 **Figure 2: Pictorial presentation of the effects of socio-demographic factors on**  
345 **maternal Hb concentration in DRC**

346

347 **Figure 3: Pictorial presentation of the effects of socio-demographic factors on**  
348 **maternal Hb concentration in Mozambique**

349

350

351

352

## 353 **Discussion**

354 This paper examined the effects of socio-demographic factors on maternal Hb  
355 concentration in Ghana, DRC and Mozambique, using quantile regression  
356 to understand the differential effects of putative socio-demographic factors at different  
357 points of the conditional distribution of maternal Hb concentration. Our QR results  
358 showed that in Ghana, one-year increase in maternal education was associated with an  
359 improved Hb concentration of mothers in the 5<sup>th</sup> and 10<sup>th</sup> quantiles, while the effect on  
360 the Hb of mothers in the other four quantiles did not reach statistical significance.  
361 However, the OLS results show that one-year increase maternal education was  
362 associated with a unit increase in Hb concentration of all mothers. This paints just a part  
363 of the picture and therefore can be misleading. However, in Mozambique, maternal  
364 education had a decreasing effect on Hb concentration across quantiles (from 5<sup>th</sup> to  
365 90<sup>th</sup>). Our findings in the two countries imply a disproportionate positive effect of  
366 maternal education accruing to mothers in the lower tail of the Hb distribution--improving  
367 maternal education may be more impactful on the Hb concentration of mothers in the  
368 lower than the upper quantiles. Conversely, a year increase in maternal years of  
369 schooling was associated with a unit decrease in Hb concentration of mothers in the  
370 three upper quantiles in DRC. These findings are puzzling as the literature suggests  
371 that education consistently predict positive health outcomes in women(18, 25, 37,  
372 38). For example, study using multicountry data concluded that women with higher  
373 years of education were less likely to be anaemic relative to those with fewer years of  
374 schooling (37). Further research is needed to elucidate the possible factors accounting  
375 for the negative effect of maternal education on maternal health outcomes in DRC. Our  
376 study together with the above studies, despite using different analytical strategies,  
377 strongly suggest that education has positive effects on maternal health outcomes.

378

379 Our analysis also showed that maternal BMI has a significant positive effect on Hb  
380 concentration in at least three quantiles in each country. The most significant effect of  
381 BMI was among mothers in the lower quantiles in each country. This suggests that  
382 interventions targeted at improving maternal BMI qualitatively are likely to be more

383 effective in increasing the Hb concentration of mothers in the lower tail of the Hb  
384 distribution. It is worthy to note that the effects of BMI were not across all quantiles.  
385 Hence, the OLS estimates, which suggested that a unit change in maternal BMI is  
386 associated with a unit increase in Hb concentration among all mothers, may be  
387 misleading. The QR findings, are, therefore, critical for identifying the groups that need  
388 to be targeted in programme planning. The literature corroborated the findings of our  
389 study. Several studies using either linear or logistic regression analytical strategies  
390 suggested that women with higher BMI tend to have higher levels of Hb concentration  
391 (22, 23, 37).

392

393 Similarly, breastfeeding had significant positive effect on maternal Hb concentration in  
394 all the three countries. Mothers who were breastfeeding at the time of the survey tended  
395 to have better Hb concentration compared with non-breastfeeding mothers. The largest  
396 effects were observed among mothers in the lower quantiles, suggesting that  
397 intervention to promote breastfeeding among lactating mothers may have more impact  
398 on Hbs of mothers at the lower end of the Hb distribution. These findings may appear  
399 puzzling because it is generally believed that lactating mothers tend to lose some iron to  
400 their infants, which may have a bearing on their Hb concentration (39, 40).  
401 Nevertheless, other evidence suggests that the iron contained in breast milk to children  
402 is not significant enough to deplete the iron level of the mother, unless the mother is  
403 already anaemic (41). The literature further suggests that mothers who are anaemic  
404 during pregnancy and postpartum can recover through intake of iron rich diet and/or iron  
405 supplement, and may not suffer low Hb concentration during lactation (41-43). The  
406 preceding discussion suggests that breastfeeding may not necessarily deplete maternal  
407 iron level, with the consequential negative effect on Hb concentration. Some available  
408 evidence suggests a positive effect of breastfeeding on maternal Hb (39). Other studies  
409 observed inverse relationship between breastfeeding and Hb concentration levels (40,  
410 44). These mixed findings notwithstanding, the findings in the present study, together  
411 with the literature suggest that breastfeeding can indeed have positive effects on

412 maternal Hb concentration levels, although the mechanism through which this happens  
413 may be complicated.

414

415 Our findings in Mozambique suggest that household wealth index (HWI) had a positive  
416 and increasing (from 5<sup>th</sup> to 90<sup>th</sup>) effect on Hb concentration across all quantiles. The  
417 least effect was on mothers in the lower end of the Hb distribution, while the largest  
418 effect was on mothers at the upper end of the distribution. Thus, improving HWI may be  
419 more impactful on mothers at the upper quantiles relative to those at the lower  
420 quantiles. The positive association between HWI and women health outcomes have  
421 been substantially documented (39, 45, 46). The evidence is that mothers who live in  
422 better-off households tend to have higher levels of Hb concentration (39). However, in  
423 Ghana, mothers who live in poor households and are in the 5<sup>th</sup> and 10<sup>th</sup> quantiles  
424 tended to have lower Hb concentration. The finding in Ghana is consistent with the  
425 literature, which often identifies poverty as a risk factor of maternal health outcomes (25,  
426 47).

427

428 An essential strength of this study is that the outcome variable was objectively  
429 measured, thereby reducing the possible biases associated with subjective  
430 measurements. The use of QR helped to examine the effects of the socio-demographic  
431 factors at different points of the Hb concentration, and thus present a comprehensive  
432 picture of the effects. Another necessary strength is the use of nationally representative  
433 data, making it possible for the results to be generalised to all women of reproductive  
434 age in the respective countries. We could not establish causality in this study due to the  
435 cross-sectional nature of the data. Also, missing data is an essential limitation of  
436 secondary data analysis. However, due to the robust measures put place by DHS to  
437 ensure the completeness of their datasets, missing data was not an issue in our study.

438

439 **Conclusions**

440 We used quantile regression to examine the effects of socio-demographic factors on  
441 maternal Hb concentration. Our analysis demonstrated substantially that the various  
442 putative socio-demographic factors have differential effects on maternal Hb  
443 concentration at different points of the Hb distribution in all countries. Interventions and  
444 programmes to address maternal anaemia must take into account the different effects  
445 of the various socio-demographic factors on Hb concentration throughout the different  
446 percentiles of the Hb distribution. It may help identify suitable interventions for groups  
447 most in need.

448

#### 449 **Acknowledgements**

450 We wish to express our gratitude to The DHS Program, USA, for providing us access to  
451 the data. We also want to acknowledge the institutions of respective countries that  
452 played critical roles in the data collection processes.

453

#### 454 **Competing Interest**

455 The authors have no competing interests to declare.

#### 456 **Funding**

457 This study did not receive funding from any source.

458

#### 459 **Data Sharing Statement**

460 This study was a re-analysis of existing data that are publicly available from The DHS  
461 Program at <http://dhsprogram.com/publications/publication-fr221-dhs-final-reports.cfm>.  
462 Data are accessible free of charge upon registration with the Demographic and Health  
463 Survey program (The DHS Program). The registration is done on the DHS website  
464 indicated above.

#### 465 **Authors' Contribution**

466 DAA conceived and designed the study, interpreted the results, wrote the first draft of  
467 the manuscript, and contributed to the revision of the manuscript. DAA and ZTD  
468 analysed the data. ZTD and CK contributed to study design, data interpretation, and  
469 critical revision of the manuscript. All authors take responsibility for any issues that  
470 might arise from the publication of this manuscript.

471

472

## 473 References

- 474 1. World Health Organization. Anaemia 2018 [Available from: [https://www.who.int/health-topics/anaemia#tab=tab\\_1](https://www.who.int/health-topics/anaemia#tab=tab_1).
- 475 2. World Health Organization. WHO. Nutritional anaemias: tools for effective prevention and  
476 control. Nutrition [cited 2020 6.5]. Available from:  
477 <http://www.who.int/nutrition/publications/micronutrients/anaemias-tools-prevention-control/en/>.
- 478 3. Chaparro CM, Suchdev PS. Anemia epidemiology, pathophysiology, and etiology in low- and  
479 middle-income countries. *Annals of the New York Academy of Sciences*. 2019;1450(1):15-31.
- 480 4. Kassebaum NJ. The Global Burden of Anemia. *Hematology/oncology clinics of North America*.  
481 2016;30(2):247-308.
- 482 5. World Health Organization. Global Targets 2025: to improve maternal, infant and young child  
483 nutrition [cited 2020 6.5]. Available from: <https://www.who.int/nutrition/global-target-2025/en/>.
- 484 6. World Health Organization. Nutrition: Global Nutrition Targets 2025: Anaemia policy brief 2014  
485 [cited 2020 6.5]. Available from:  
486 [https://www.who.int/nutrition/publications/globaltargets2025\\_policybrief\\_anaemia/en/](https://www.who.int/nutrition/publications/globaltargets2025_policybrief_anaemia/en/).
- 487 7. Lopez A, Cacoub P, Macdougall IC, Peyrin-Biroulet L. Iron deficiency anaemia. *Lancet*.  
488 2016;387(10021):907-16.
- 489 8. Young MF. Maternal anaemia and risk of mortality: a call for action. *Lancet Glob Health*.  
490 2018;6(5):e479-e80.
- 491 9. Stevens GA, Finucane MM, De-Regil LM, Paciorek CJ, Flaxman SR, Branca F, et al. Global,  
492 regional, and national trends in haemoglobin concentration and prevalence of total and severe anaemia  
493 in children and pregnant and non-pregnant women for 1995-2011: a systematic analysis of population-  
494 representative data. *Lancet Glob Health*. 2013;1(1):e16-25.
- 495 10. United Nations. Sustainable Development Goals 2015 [cited 2020 6.5]. Available from:  
496 <http://www.un.org/sustainabledevelopment/sustainable-development-goals/>.
- 497 11. Ayoya MA, Bendeck MA, Zagr e NM, Tchibindat F. Maternal anaemia in West and Central Africa:  
498 time for urgent action. *Public health nutrition*. 2012;15(5):916-27.
- 499 12. van den Broek N. Anaemia in pregnancy in sub-Saharan countries. *European Journal of*  
500 *Obstetrics and Gynecology and Reproductive Biology*. 2001;96(1):4-6.
- 501 13. Tako EA, Zhou A, Lohoue J, Leke R, Taylor DW, Leke RFG. Risk factor for placental malaria and its  
502 effect on pregnancy outcome in Yaounde, Cameroon. *Am J Trop Med Hyg*. 2005;72.
- 503 14. Rahman MM, Abe SK, Rahman MS, Kanda M, Narita S, Bilano V, et al. Maternal anemia and risk  
504 of adverse birth and health outcomes in low- and middle-income countries: systematic review and  
505 meta-analysis. *Am J Clin Nutr*. 2016;103(2):495-504.
- 506



- 507 15. Black RE, Victora CG, Walker SP, Bhutta ZA, Christian P, de Onis M, et al. Maternal and child  
508 undernutrition and overweight in low-income and middle-income countries. *Lancet*.  
509 2013;382(9890):427-51.
- 510 16. Kavle JA, Stoltzfus RJ, Witter F, Tielsch JM, Khalfan SS, Caulfield LE. Association between  
511 anaemia during pregnancy and blood loss at and after delivery among women with vaginal births in  
512 Pemba Island, Zanzibar, Tanzania. *Journal of health, population, and nutrition*. 2008;26(2):232-40.
- 513 17. Christian P, Mullany LC, Hurley KM, Katz J, Black RE. Nutrition and maternal, neonatal, and child  
514 health. *Seminars in perinatology*. 2015;39(5):361-72.
- 515 18. Chowdhury HA, Ahmed KR, Jebunessa F, Akter J, Hossain S, Shahjahan M. Factors associated  
516 with maternal anaemia among pregnant women in Dhaka city. *BMC women's health*. 2015;15:77.
- 517 19. Kofie P, Tarkang EE, Manu E, Amu H, Ayanore MA, Aku FY, et al. Prevalence and associated risk  
518 factors of anaemia among women attending antenatal and post-natal clinics at a public health facility in  
519 Ghana. *BMC Nutrition*. 2019;5(1):40.
- 520 20. Mockenhaupt FP, Rong B, Günther M, Beck S, Till H, Kohne E, et al. Anaemia in pregnant  
521 Ghanaian women: importance of malaria, iron deficiency, and haemoglobinopathies. *Transactions of the*  
522 *Royal Society of Tropical Medicine and Hygiene*. 2000;94(5):477-83.
- 523 21. Gaillard R, Eilers PH, Yassine S, Hofman A, Steegers EA, Jaddoe VW. Risk factors and  
524 consequences of maternal anaemia and elevated haemoglobin levels during pregnancy: a population-  
525 based prospective cohort study. *Paediatric and perinatal epidemiology*. 2014;28(3):213-26.
- 526 22. Hakizimana D, Nisingizwe MP, Logan J, Wong R. Identifying risk factors of anemia among women  
527 of reproductive age in Rwanda - a cross-sectional study using secondary data from the Rwanda  
528 demographic and health survey 2014/2015. *BMC public health*. 2019;19(1):1662-.
- 529 23. Bentley ME, Griffiths PL. The burden of anemia among women in India. *European journal of*  
530 *clinical nutrition*. 2003;57(1):52-60.
- 531 24. Gobezie M, Mekonnen Z, Alem M, Enawgaw B. Prevalence and Predictors of Maternal Anemia  
532 during Pregnancy in Gondar, Northwest Ethiopia: An Institutional Based Cross-Sectional Study. *Anemia*.  
533 2014;2014:108593.
- 534 25. Harding KL, Aguayo VM, Namirembe G, Webb P. Determinants of anemia among women and  
535 children in Nepal and Pakistan: An analysis of recent national survey data. *Maternal & child nutrition*.  
536 2018;14 Suppl 4(Suppl 4):e12478.
- 537 26. The DHS Program. Demographic and Health Surveys [Available from:  
538 <http://dhsprogram.com/data/available-datasets.cfm>.
- 539 27. Amugsi DA, Dimbuene ZT, Kimani-Murage EW, Mberu B, Ezeh AC. Differential effects of dietary  
540 diversity and maternal characteristics on linear growth of children aged 6-59 months in sub-Saharan  
541 Africa: a multi-country analysis. *Public health nutrition*. 2017;20(6):1029-45.
- 542 28. Ghana Statistical Service (GSS), Ghana Health Service (GHS), ICF Macro. Ghana Demographic and  
543 Health Survey 2008 Accra, Ghana: GSS, GHS, and ICF Macro; 2009.
- 544 29. Ministry of Health and Social Services (MoHSS), Macro International Inc. Namibia Demographic  
545 and Health Survey 2006-07 Windhoek, Namibia and Calverton, Maryland, USA: MoHSS and Macro  
546 International Inc. ; 2008.
- 547 30. Ghana Statistical Service (GSS), Ghana Health Service (GHS), ICF International. Ghana  
548 Demographic and Health Survey 2014. Rockville, Maryland, USA: GSS, GHS, and ICF International.; 2015.
- 549 31. National Population Commission (NPC) [Nigeria], ICF International. Nigeria Demographic and  
550 Health Survey 2013. Abuja, Nigeria, and Rockville, Maryland, USA: NPC and ICF International. . 2014.
- 551 32. National Bureau of Statistics-Kenya, ICF International. 2014 KDHS Key Findings. Rockville,  
552 Maryland, USA: KNBS and ICF International. 2015.
- 553 33. World Medical Association. Declaration of Helsinki: Ethical Principles for Medical Research  
554 Involving Human Subjects. *Bulletin of the World Health Organization*. 2001;79(4).

- 555 34. Koenker R, Bassett G. Regression quantiles *Econometrica*. 1978;46(1):33-50.
- 556 35. Amugsi DA, Dimbuene ZT, Bakibinga P, Kimani-Murage EW, Haregu TN, Mberu B. Dietary  
557 diversity, socioeconomic status and maternal body mass index (BMI): quantile regression analysis of  
558 nationally representative data from Ghana, Namibia and Sao Tome and Principe. *BMJ Open*. 2016;6(9):  
559 doi:10.1136/bmjopen-2016-012615.
- 560 36. Amugsi DA, Dimbuene ZT, Bakibinga P, Kimani-Murage EW, Haregu TN, Mberu B. Dietary  
561 diversity, socioeconomic status and maternal body mass index (BMI): quantile regression analysis of  
562 nationally representative data from Ghana, Namibia and Sao Tome and Principe. *BMJ Open*. 2016;6(9).
- 563 37. DHS. Anaemia among women and children [cited 2020 22.04]. Available from:  
564 <https://www.dhsprogram.com/pubs/pdf/OD28/12Chapter12.pdf>.
- 565 38. Balarajan YS, Fawzi WW, Subramanian SV. Changing patterns of social inequalities in anaemia  
566 among women in India: cross-sectional study using nationally representative data. *BMJ Open*. 2013;3(3).
- 567 39. Lakew Y, Biadgilign S, Haile D. Anaemia prevalence and associated factors among lactating  
568 mothers in Ethiopia: evidence from the 2005 and 2011 demographic and health surveys. *BMJ open*.  
569 2015;5(4):e006001-e.
- 570 40. Friel J, Qasem W, Cai C. Iron and the Breastfed Infant. *Antioxidants (Basel)*. 2018;7(4):54.
- 571 41. Petraro P, Duggan C, Urassa W, Msamanga G, Makubi A, Spiegelman D, et al. Determinants of  
572 anemia in postpartum HIV-negative women in Dar es Salaam, Tanzania. *European journal of clinical*  
573 *nutrition*. 2013;67(7):708-17.
- 574 42. Abioye AI, Aboud S, Premji Z, Etheredge AJ, Gunaratna NS, Sudfeld CR, et al. Iron  
575 Supplementation Affects Hematologic Biomarker Concentrations and Pregnancy Outcomes among Iron-  
576 Deficient Tanzanian Women. *J Nutr*. 2016;146(6):1162-71.
- 577 43. Jorgensen JM, Yang Z, Lönnerdal B, Chantry CJ, Dewey KG. Effect of iron supplementation during  
578 lactation on maternal iron status and oxidative stress: A randomized controlled trial. *Maternal & child*  
579 *nutrition*. 2017;13(4).
- 580 44. Abu-Ouf NM, Jan MM. The impact of maternal iron deficiency and iron deficiency anemia on  
581 child's health. *Saudi Med J*. 2015;36(2):146-9.
- 582 45. Ejigu BA, Wencheke E, Berhane K. Spatial pattern and determinants of anaemia in Ethiopia. *PloS*  
583 *one*. 2018;13(5):e0197171-e.
- 584 46. Gebremedhin S, Enquesslassie F, Umeta M. Prevalence and correlates of maternal anemia in  
585 rural Sidama, Southern Ethiopia. *African journal of reproductive health*. 2014;18(1):44-53.
- 586 47. Derso T, Abera Z, Tariku A. Magnitude and associated factors of anemia among pregnant women  
587 in Dera District: a cross-sectional study in northwest Ethiopia. *BMC Res Notes*. 2017;10(1):359.
- 588
